# Supplementary material for: Flipped classroom-based application of Peyton’s four-step approach in standardized training of ultrasound residents for thyroid and cervical lymph node zoning
Source: PeerJ. 2024 Dec 18;12:e18633. doi: 10.7717/peerj.18633 (PMC11662902; doi:10.7717/peerj.18633)
Supplement: Supplemental Information 1 — The observation group got higher scores in skill operation and clinical case analysis than higher scores in skill operation and clinical case analysis. The questionnaire survey results indicated that observation students can improved learning interest and reduced exam pressure compared to the control group. [file peerj-12-18633-s001.xlsx]

## Sheet: raw data
			Assessment				Questionnaire
No.	age		Skills Assessment		Clinical Case Analysis		Course’s ability to stimulate learning interest		Course’s effectiveness in alleviating residency examination pressure		Overall course satisfaction evaluation
	control group	Peyton	control group	observation group	control group	observation group	control group	observation group	control group	observation group	control group	observation group
1	28	30	84	88	88	90	3	5	3	5	5	5
2	26	27	84	88	92	92	4	5	3	4	4	4
3	26	27	82	90	86	86	4	5	2	5	4	5
4	26	26	88	92	88	90	3	4	3	5	4	5
5	36	26	84	90	86	90	4	5	2	5	5	4
6	25	26	86	88	80	88	3	5	2	5	4	5
7	25	27	82	86	86	86	5	4	3	4	4	4
8	25	28	82	82	86	90	4	5	3	5	4	4
9	25	26	80	96	78	96	4	5	3	5	5	5
10	25	25	80	92	76	86	3	5	3	3	4	4
11	25	25	76	80	80	78	5	4	4	4	4	4
12	24	29	86	90	82	88	4	5	3	5	5	4
13	24	26	70	84	80	90	2	5	4	4	4	5
14	24	27	78	88	82	90	3	5	4	5	5	5
15	23	25	66	92	80	92	3	4	3	5	4	4
16	23	25	80	86	82	92	4	5	3	4	5	4
17	33	24	82	90	80	90	4	4	3	5	3	5
18	30	24	88	84	78	92	5	4	4	3	4	5
19	26	27	86	88	78	82	3	5	3	4	4	4
20	28	23	74	90	76	96	5	5	3	5	5	5
21	25	28	88	86	86	90	3	4	4	5	5	4
22	25	26	86	82	86	80	3	5	3	5	5	3
23	28	26	78	86	82	86	3	5	4	4	4	4
24	29	24	90	86	84	84	5	5	3	4	4	4
25	25	25	76	84	86	90	2	4	3	5	5	5
26	27	26	70	92	88	94	4	3	5	5	4	4
27	28	27	84	88	82	86	3	5	3	4	5	5
28	26	24	76	90	90	84	5	5	3	5	5	5
29	27	26	76	80	78	82	4	4	4	5	4	4
30	27	27	74	86	80	84	3	4	4	4	4	5
31	29	28	86	90	82	88	4	5	3	4	5	5
32	26	29	74	86	78	90	4	4	2	4	4	4
33	29	25	80	92	88	80	4	5	4	5	5	4
